# Supplementary material for: Effect of Supplementing a Bacillus Multi-Strain Probiotic to a Post-Weaning Diet on Nutrient Utilisation and Nitrogen Retention of Piglets
Source: MDPI journal article supplement (doi:10.3390/ani13233597), 2023-11-21
Supplement: s1 [file s1]

*Supplementary Material*

# Effect of supplementing a *Bacillus* multi-strain probiotic to a post-weaning diet on nutrient utilization and nitrogen retention of piglets.

Anne M.S. Huting, L. Vanessa Lagos, Lea H.B. Hansen, and Francesc Molist

**Supplementary Table S1.** Analysed dietary nutrient content of the experimental diets (i.e. control diet = CD; supplemented diet = SD), in g/kg.

| Treatment | Moisture | Ash | CP  | CFat | CF | Starch | Sugar | Ti   |
|-----------|----------|-----|-----|------|----|--------|-------|------|
| CD        | 112      | 55  | 186 | 51   | 37 | 370    | 40    | 2.95 |
| SD        | 109      | 56  | 188 | 51   | 37 | 373    | 43    | 3.01 |

**Supplementary Table S2.** CFU recovery analysis of the experimental diets (i.e. control diet = CD; supplemented diet = SD).

| Treatment | Sample type | Expected, CFU/g | Result, CFU/g |
|-----------|-------------|-----------------|---------------|
| CD        | Mash        | <1.00E+05       | 3.10E+04      |
| CD        | Pellet      | <1.00E+05       | 3.10E+04      |
| SD        | Mash        | 1.10E+06        | 1.51E+06      |
| SD        | Pellet      | 1.10E+06        | 1.41E+06      |

**Supplementary Table S3.** The effect of experimental treatment (i.e. control diet = CD; supplemented diet = SD) on piglet performance.

| Parameter <sup>1</sup>    | CD   | SD   | SEM   | <i>P</i> -value |
|---------------------------|------|------|-------|-----------------|
| Weaning age, day          |      |      |       |                 |
| Day 0 <sup>2</sup>        | 29.8 | 29.6 | 0.53  | 0.64            |
| Body weight, kg           |      |      |       |                 |
| Day 0 <sup>2</sup>        | 8.48 | 8.48 | 0.013 | 1.00            |
| Day 11                    | 11.5 | 11.2 | 0.26  | 0.46            |
| Day 19 <sup>2</sup>       | 15.3 | 15.0 | 0.62  | 0.74            |
| ADG, g/piglet             |      |      |       |                 |
| Day 0-11                  | 275  | 246  | 23.5  | 0.46            |
| Day 11-19 <sup>2</sup>    | 285  | 263  | 11.2  | 0.27            |
| ADFI, g/piglet            |      |      |       |                 |
| Day 0-11                  | 285  | 263  | 11.2  | 0.27            |
| FCR, g/g                  |      |      |       |                 |
| Day 0-11                  | 1.05 | 1.09 | 0.088 | 0.78            |
| Faecal score <sup>2</sup> |      |      |       |                 |
| Day 0-11                  | 6.78 | 6.96 | 0.239 | 0.63            |
| Day 11-19 <sup>2</sup>    | 6.69 | 6.72 | 0.105 | 0.86            |

<sup>1</sup> The experimental unit was pen ( $n = 4$ ) in case not stated otherwise. Replicate (1 to 4) was used as random effect. The experimental results were analysed using a two-way analysis of variance (ANOVA) by GenStat®.

<sup>2</sup> An 8-point scale from severe water thin diarrhoea to hard, dry and lumpy faeces was used for faecal consistency determination. Faecal score 6 was considered the optimal faecal score (see for protocol [13]).

<sup>3</sup> The experimental unit was piglet ( $n = 8$ ). Replicate (1 to 8) was used as random effect. The experimental results were analysed using a two-way analysis of variance (ANOVA) by GenStat®.

**Supplementary Table S4.** The effect of experimental treatment (i.e. control diet = CD; supplemented diet = SD) on apparent ileal digestibility of amino acids.<sup>1</sup>

| Parameter               | CD             | SD             | SEM  | P-value |
|-------------------------|----------------|----------------|------|---------|
| Indispensable AA, %     |                |                |      |         |
| Arg                     | 77.6           | 76.9           | 2.47 | 0.87    |
| His                     | 78.0           | 77.7           | 2.34 | 0.93    |
| Ile                     | 74.2           | 75.2           | 2.53 | 0.80    |
| Leu                     | 75.6           | 76.5           | 2.29 | 0.80    |
| Lys                     | 82.3           | 83.7           | 1.97 | 0.64    |
| Met <sup>2</sup>        | 88.1           | 88.5           | -    | 0.85    |
|                         | (-93.6 - 93.8) | (-93.5 - 93.8) |      |         |
| Phe                     | 78.8           | 78.4           | 2.52 | 0.93    |
| Thr <sup>2</sup>        | 74.9           | 75.5           | -    | 0.85    |
|                         | (-84.9 - 85.7) | (-84.8 - 85.8) |      |         |
| Trp                     | 71.6           | 72.3           | 2.28 | 0.84    |
| Val                     | 75.6           | 78.0           | 3.20 | 0.61    |
| Dispensable AA, %       |                |                |      |         |
| Ala                     | 65.4           | 64.9           | 3.48 | 0.92    |
| Asp                     | 69.7           | 68.2           | 3.53 | 0.78    |
| Cys                     | 66.0           | 61.6           | 4.39 | 0.51    |
| Glu                     | 81.0           | 79.2           | 2.73 | 0.65    |
| Gly                     | 47.6           | 44.6           | 6.95 | 0.77    |
| Pro                     | 71.4           | 56.6           | 8.43 | 0.27    |
| Ser                     | 73.1           | 71.6           | 2.48 | 0.69    |
| Tyr                     | 70.5           | 73.4           | 3.06 | 0.54    |
| All indispensable AA, % | 77.0           | 77.6           | 2.45 | 0.88    |
| All dispensable AA, %   | 72.4           | 67.0           | 4.17 | 0.40    |
| All AA, %               | 74.5           | 71.7           | 3.34 | 0.60    |

<sup>1</sup> The experimental unit was piglet ( $n = 8$ ). Replicate (1 to 8) was used as random effect. The experimental results were analysed using a two-way analysis of variance (ANOVA) by GenStat®. From replicate 2 of treatment SD not enough ileal content was left to perform the AA analysis, therefore this piglet was treated as missing value.

<sup>2</sup> This parameter was considered not normally distributed in its original form (i.e. Shapiro Wilk  $P < 0.05$ ).

Transformation suggestions were made by the "ABOXCox" procedure in Genstat. The apparent ileal Met and apparent ileal Thr digestibility coefficients were transformed using  $(X-100)^{-4}$ . For presentation purposes the calculated means were back transformed and are presented together with the 95% confidence interval (CI, using Bonferroni inequality) instead of SEM.

**Supplementary Table S5.** The effect of experimental treatment (i.e. control diet = CD; supplemented diet = SD) on pH of the digesta content.

| Parameter <sup>1</sup> | CD   | SD   | SEM   | <i>P</i> -value |
|------------------------|------|------|-------|-----------------|
| Jejunum                | 6.50 | 6.48 | 0.085 | 0.86            |
| Ileum                  | 6.70 | 6.63 | 0.095 | 0.64            |
| Colon                  | 5.75 | 5.84 | 0.037 | 0.15            |

<sup>1</sup> The experimental unit was piglet ( $n = 8$ ). Replicate (1 to 8) was used as random effect. The experimental results were analysed using a two-way analysis of variance (ANOVA) by GenStat®. Piglets from replicate 2 (i.e. one piglet from the CD and one piglet from the SD treatment) had a ileum pH content that was > 2.5 times lower than the standard error of the residuals and were therefore considered outlier.
